# Supplementary material for: Demixing of an active-passive binary mixture through a two-dimensional elastic meshwork
Source: Royal Society of Chemistry journal article supplement (doi:10.1039/d4sm01443j), 2025-01-01
Supplement: d4sm01443j7.pdf [file d4sm01443j7.pdf]

## Supplementary Material: Demixing of active-passive binary mixture through a two-dimensional elastic meshwork

Ramanand Singh Yadav and Rajarshi Chakrabarti\*

*Department of Chemistry,*

*Indian Institute of Technology Bombay, Mumbai 400076, India*

*E-mail: rajarshi@chem.iitb.ac.in*

TABLE I. Model Parameters

| Parameter                | Value                                     |
|--------------------------|-------------------------------------------|
| $\sigma_{\text{tracer}}$ | $2\sigma$                                 |
| $\sigma_{\text{beads}}$  | $\sigma$                                  |
| $l_{\text{mesh}}$        | $\sigma, 1.5\sigma, 2.0\sigma, 2.5\sigma$ |
| $\frac{m}{\zeta}$        | $10^{-2}$                                 |
| $k_B T$                  | 1                                         |
| $\Delta t$               | $5 \times 10^{-3}$                        |
| $\epsilon_{ij}$          | 1                                         |
| $F_a$                    | 0, 5, 10, 15, 20, 30, 40, 50, 60, 70      |

### I. MEAN-SQUARED DISPLACEMENT, DIFFUSION COEFFICIENT AND PERSISTENCE TIME OF A FREE ACTIVE BROWNIAN PARTICLE

To understand the dynamics and persistence time of ABPs with the mentioned parameters ( $\gamma = 100$ ,  $\sigma_{\text{tracer}} = 2\sigma$ ), we perform controlled simulations for free ABPs at different activity. The time-averaged mean square displacement is calculated as:  $\overline{\Delta r_i^2(\tau)} = \frac{1}{T_{\text{max}} - \tau} \int_0^{T_{\text{max}} - \tau} [r_i(t + \tau) - r_i(t)]^2 dt$  followed by an ensemble average over  $N_{\text{trj}}$  trajectories, defined as:  $\langle \overline{\Delta r^2(\tau)} \rangle = \frac{1}{N_{\text{trj}}} \sum_{i=1}^{N_{\text{trj}}} \overline{\Delta r_i^2(\tau)}$ . A plot showing the time evolution of  $\langle \overline{\Delta r^2(\tau)} \rangle$  is shown in Fig. S1 (a). The effective diffusion coefficient,  $D_{\text{eff}}$ , is calculated using the equation:

$$D_{\text{eff}} = \lim_{\tau \rightarrow \infty} \frac{\langle \overline{\Delta r^2(\tau)} \rangle}{6\tau}$$

In the presence of thermal noise, the effective diffusion coefficient of ABPs has two contributions: thermal diffusivity  $D_T$  and the convective diffusivity, such that  $D_{eff} = D_T + D_{swim}$  [1]. In the dilute limit  $D_{swim}$  is given by:  $D_{swim} = \frac{F_a^2 \tau_R}{3\gamma^2}$ . Using this equation, the persistence time is determined from the intercept of the log-log plot of  $D_{swim}$  versus activity which is shown in Fig. S1 (b), where  $Pe$  is defined as  $Pe = \frac{F_a \sigma_{tracer}}{k_B T}$ .

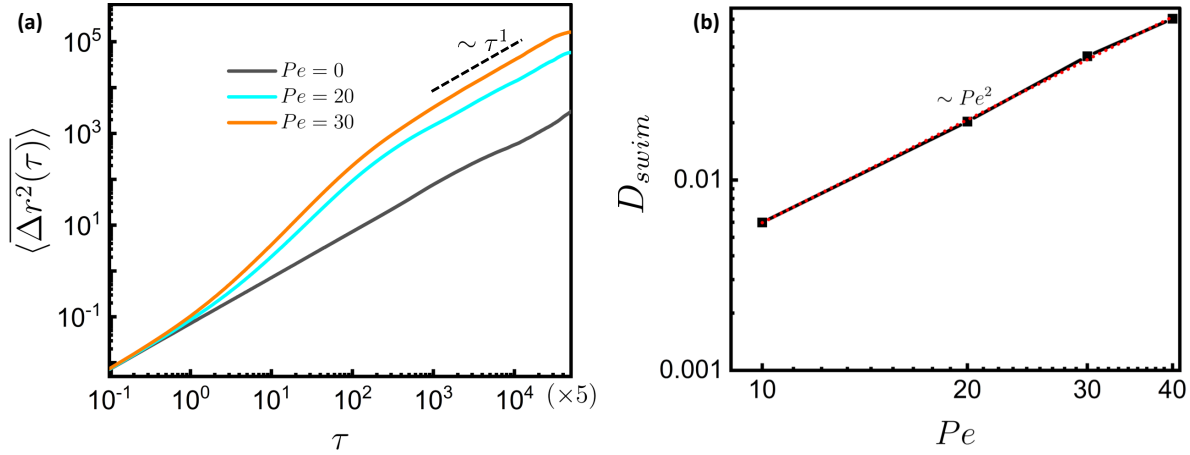

Fig. S1. Log-log plot of (a)  $\langle \Delta r^2(t) \rangle$  with time and (b) active diffusion coefficient  $D_{swim}$  with  $Pe$ , where red dotted line is the fitted  $Pe^2$ .

## II. PRESSURE EXERTED ON THE BEADS OF THE MESHWORK

The pressure exerted on individual bead  $i_b$  of the meshwork (Fig. 1 (b) in the main manuscript), is defined as the trace of the stress tensor:

$$\Pi_{Mesh-bead} = -\frac{1}{3dV}(\Sigma_{xx} + \Sigma_{yy} + \Sigma_{zz}), \quad (1)$$

where  $dV$  is the Voronoi volume of the meshwork bead  $i_b$ ,  $\Sigma_{xx}$ ,  $\Sigma_{yy}$  and  $\Sigma_{zz}$  are the diagonal components of the energy tensor[2, 3]. In general, the diagonal component  $\Sigma_{\alpha\alpha}$  is defined as:

$$\begin{aligned}
\Sigma_{\alpha\alpha} = & -[mv_{\alpha}v_{\alpha} + \frac{1}{2} \sum_{n=1}^{N_{pair}} (r_{1\alpha}F_{1\alpha} + r_{2\alpha}F_{2\alpha}) \\
& + \frac{1}{2} \sum_{n=1}^{N_{bond}} (r_{1\alpha}F_{1\alpha} + r_{2\alpha}F_{2\alpha}) \\
& + \frac{1}{3} \sum_{n=1}^{N_{angle}} (r_{1\alpha}F_{1\alpha} + r_{2\alpha}F_{2\alpha} + r_{3\alpha}F_{3\alpha})].
\end{aligned} \tag{2}$$

The first term represents a pairwise energy contribution, where  $n$  loops over the  $N_{pair}$  neighbors of bead  $i_b$ ,  $r_1$  and  $r_2$  are the positions of the two particles (monomers of the mesh along with the other particles in the system) involved in the pairwise interaction, and  $F_1$  and  $F_2$  are the forces acting on the two particles as a result of the interaction. The second and third terms represent the bond and angle contributions, respectively, with a similar form applied to the bonds and angles involving bead  $i_b$  (Fig. 1 (b) in the main manuscript). We plot the spatial distribution of pressure in Fig. S4, for different  $\tilde{\sigma}$  and  $Pe = 80$ . To quantify the contribution of pressure from activity, we calculate a quantity  $\chi$  which is defined as:  $\chi = -(\langle \overline{\Pi_{Mesh-bead}(Pe)} \rangle - \langle \overline{\Pi_{Mesh-bead}(Pe=0)} \rangle)$ , where  $\langle \overline{\Pi_{Mesh-bead}(Pe)} \rangle = \langle \frac{1}{t_{max} - t_1} \sum_{n=t_1}^{t_{max}} \langle \Pi_{Mesh-bead} \rangle (Pe) \rangle$  represents the averaged pressure on the meshwork beads when 50% of the colloidal particles are passive and the other 50% are active. In contrast,  $\langle \overline{\Pi_{Mesh-bead}(Pe=0)} \rangle = \langle \frac{1}{t_{max} - t_1} \sum_{n=t_1}^{t_{max}} \langle \Pi_{Mesh-bead} \rangle (Pe=0) \rangle$  represents the averaged pressure on the meshwork beads when all the particles are passive. This residual pressure on the meshwork at  $Pe = 0$  has two contributions: one from Brownian dynamics and the other from the pressure exerted by the meshwork beads on one another, governed by their mutual interactions.

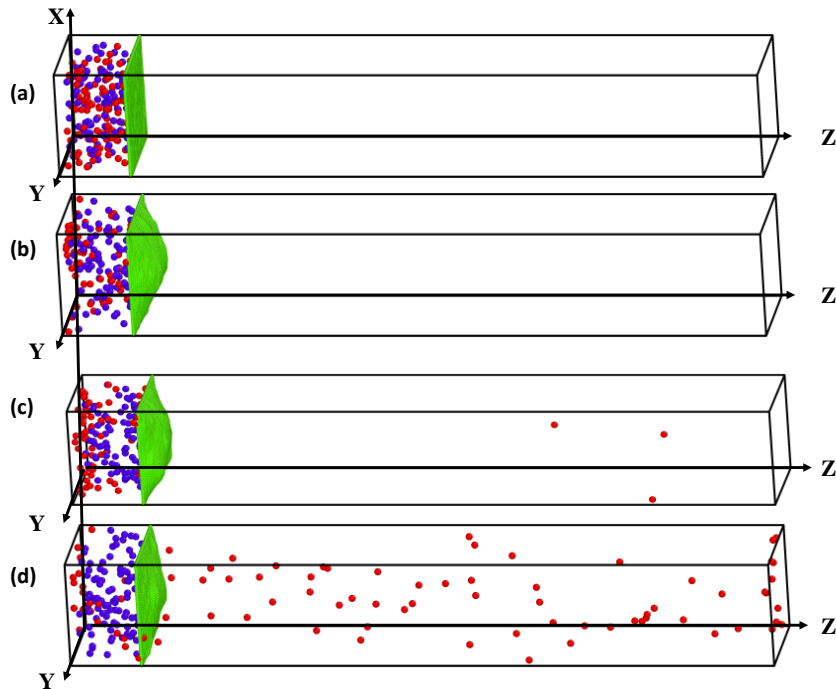

Fig. S2. Snapshots of the system with a monodisperse binary mixture of active and passive colloidal particles, allowed to pass through the meshwork, are shown as follows:(a) The initial frame, the final frame at (b)  $Pe = 120$ , (c)  $Pe = 180$  and (d)  $Pe = 220$  with  $\tilde{\sigma} = 2.00$ . Here, active particles are shown in red, passive particles in blue, and the meshwork beads in green.

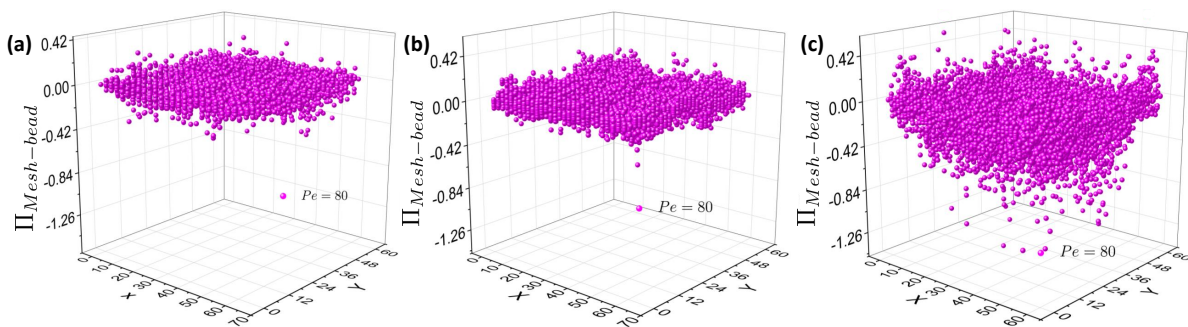

Fig. S3. Plots showing the spatial distribution of pressure on meshwork beads for  $\tilde{\sigma}$ : (a) 0.80, (b) 1.00, and (c) 1.33, with  $K = 50$  and  $Pe = 80$ .

## Movie description

### Movie\_S1

The movie demonstrates that the passive particles (blue), initially separated from the rest of the box by a two-dimensional meshwork (green) ( $\tilde{\sigma} = 0.8$  and  $K = 50$ ), are able to pass through the meshwork.

### Movie\_S2

The movie shows that the passive particles (blue), initially separated from the rest of the box by a two-dimensional meshwork (green) ( $\tilde{\sigma} = 1.0$  and  $K = 50$ ), are unable to pass through the meshwork.

### Movie\_S3

This is evident from the movie, where a 1:1 monodisperse active (red)–passive (blue) binary mixture, initially separated from the rest of the box by a two-dimensional meshwork (green) ( $\tilde{\sigma} = 1.0$ ,  $Pe = 80$ , and  $K = 50$ ), shows a significant permeation of active particles through the meshwork.

### Movie\_S4

A 1:1 monodisperse active (red)–passive (blue) binary mixture, initially separated from the rest of the box by a two-dimensional meshwork (green) ( $\tilde{\sigma} = 1.33$ ,  $Pe = 80$ , and  $K = 50$ ), is shown in the movie, which demonstrates that there is no significant permeation of active particles through the meshwork.

### Movie\_S5

In this movie, a 1:1 monodisperse binary mixture of active (red) and passive (blue) particles is initially confined within a two-dimensional meshwork (green) ( $\tilde{\sigma} = 1.33$ ,  $Pe = 120$ , and  $K = 50$ ). It is evident that the active particles primarily permeate through the meshwork.

### Movie\_S6

The movie illustrates the significant permeation of active particles (red) through the two-dimensional meshwork (green), which initially separates a 1:1 monodisperse binary mixture of active (red) and passive (blue) particles ( $\tilde{\sigma} = 1.33$ ,  $Pe = 80$ , and  $K = 20$ ).

- 
- [1] Y. Du, H. Jiang and Z. Hou, *Soft Matter*, 2019, **15**, 2020.
  - [2] A. P. Thompson, S. J. Plimpton and W. Mattson, *J. Chem. Phys.*, 2009, **131**, 154107.
  - [3] R. G. Winkler, A. Wysocki and G. Gompper, *Soft Matter*, 2015, **11**, 6680.
